# Supplementary material for: A new antimony-based organic–inorganic hybrid absorber with photoconductive response
Source: Royal Society of Chemistry journal article supplement (doi:10.1039/c8qi00902c), 2018-01-01
Supplement: c8qi00902c1.pdf [file c8qi00902c1.pdf]

# Supporting Information

## A New Antimony-Based Organic-Inorganic Hybrid Absorber with Photoconductive Response

Asma Khan,<sup>a,b</sup> Shiguo Han,<sup>a,b</sup> Xitao Liu,<sup>a</sup> Kewen Tao,<sup>a</sup> Dhananjay Dey,<sup>a</sup> Junhua Luo<sup>a\*</sup>  
and Zihua Sun,<sup>a\*</sup>

<sup>a</sup> State Key Laboratory of Structural Chemistry, Fujian Institute of Research on the Structure of Matter  
(FJIRSM), Chinese Academy of Sciences (CAS), Fuzhou, Fujian 350002, P. R. China

<sup>b</sup> University of Chinese Academy of Sciences (UCAS), Beijing 100190, P. R. China

\*Correspondence: [jhluo@fjirsm.ac.cn](mailto:jhluo@fjirsm.ac.cn); [sunzihua@fjirsm.ac.cn](mailto:sunzihua@fjirsm.ac.cn)

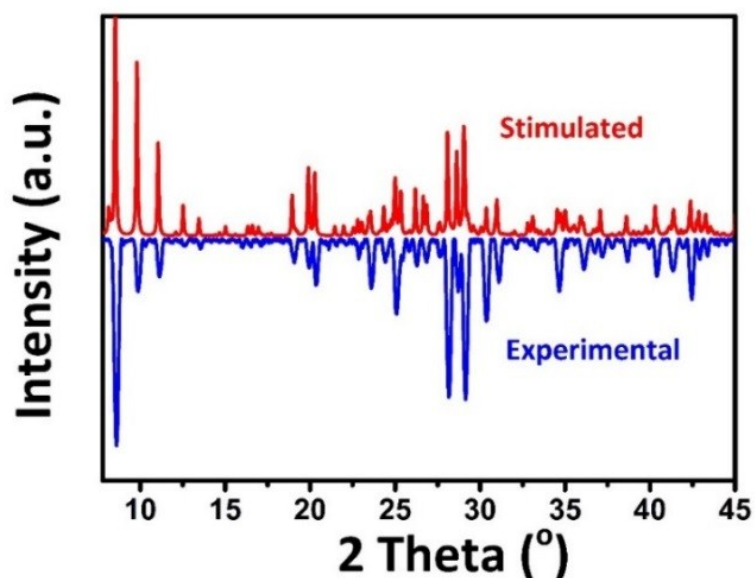

Figure S1. PXRD patterns of 1.

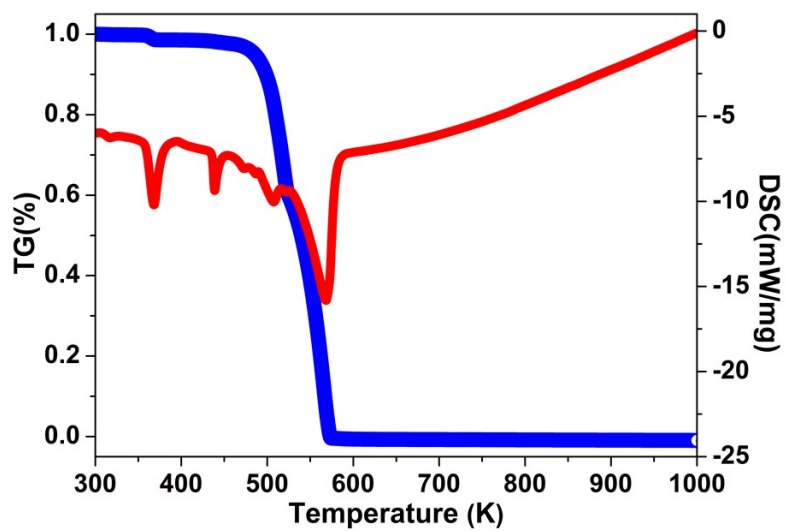

Figure S2. TG curve of **1**.

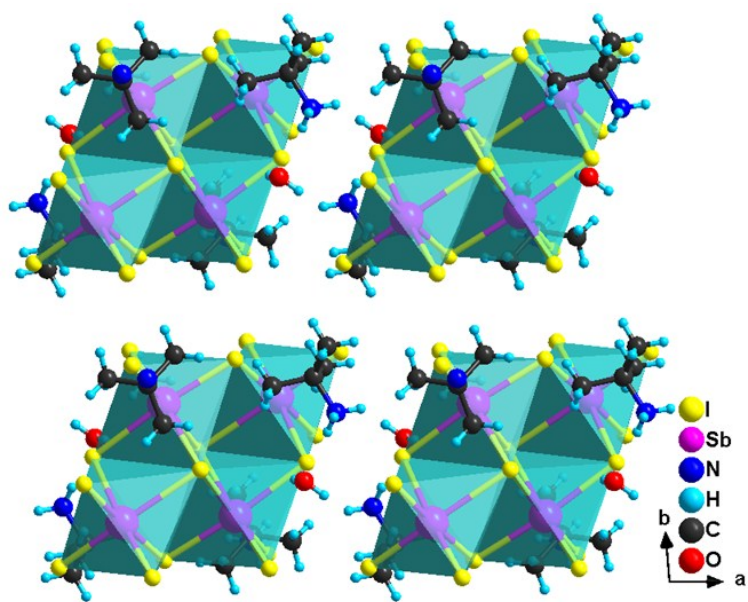

Figure S3. The packing structure of **1** viewed along the c-axis direction.

**Table S1.** Crystal structure and refinement detail of **1**.

---

|                                              |                                                                                       |
|----------------------------------------------|---------------------------------------------------------------------------------------|
| Empirical formula                            | $[(\text{CH}_3)_3\text{CNH}_2]_4[\text{Sb}_4\text{I}_{16}] \cdot 2\text{H}_2\text{O}$ |
| Formula weight                               | 2814.05                                                                               |
| Temperature/K                                | 293.15                                                                                |
| Crystal system                               | Triclinic                                                                             |
| Space group                                  | $P \bar{1}$                                                                           |
| $a/\text{\AA}$                               | 11.142(5)                                                                             |
| $b/\text{\AA}$                               | 11.794(4)                                                                             |
| $c/\text{\AA}$                               | 13.105(4)                                                                             |
| $\alpha/^\circ$ ,                            | 65.193(13),                                                                           |
| $\beta/^\circ$ ,                             | 77.627(17)                                                                            |
| $\gamma/^\circ$                              | 89.043(16)                                                                            |
| Volume/ $\text{\AA}^3$                       | 1521.6(9)                                                                             |
| $Z/\rho_{\text{calc}}$ (mg/mm <sup>3</sup> ) | 1 / 3.110                                                                             |
| m/mm <sup>-1</sup>                           | 9.892                                                                                 |
| F(000)                                       | 1224.0                                                                                |
| Theta range for data collection              | 5.13 to 55.05°                                                                        |
| Index ranges                                 | -14 ≤ h ≤ 14, -15 ≤ k ≤ 15, -17 ≤ l ≤ 17                                              |
| Reflections collected                        | 47233                                                                                 |
| Independent reflections                      | 6814 [ $R_{\text{int}} = 0.0563$ ]                                                    |
| Data/restraints/parameters                   | 6814/0/200                                                                            |
| Goodness-of-fit on $F^2$                     | 1.140                                                                                 |
| Final $R$ indexes [ $I > 2\sigma(I)$ ]       | $R_1 = 0.0270$ , $wR_2 = 0.0584$                                                      |
| Final $R$ indexes [all data]                 | $R_1 = 0.0350$ , $wR_2 = 0.0646$                                                      |

---

**Table S2.** Bond lengths for **1**.

| <b>Atom</b>    | <b>Atom</b>     | <b>Length/Å</b> | <b>Atom</b>      | <b>Atom</b>      | <b>Length/Å</b> |
|----------------|-----------------|-----------------|------------------|------------------|-----------------|
| l <sub>1</sub> | Sb <sub>1</sub> | 2.8031(8)       | l <sub>7</sub>   | Sb <sub>2</sub>  | 2.8761(9)       |
| l <sub>2</sub> | Sb <sub>1</sub> | 2.8061(9)       | l <sub>8</sub>   | Sb <sub>2</sub>  | 2.8995(8)       |
| l <sub>3</sub> | Sb <sub>1</sub> | 3.1329(12)      | N <sub>3</sub>   | C <sub>0AA</sub> | 1.521(6)        |
| l <sub>3</sub> | Sb <sub>2</sub> | 3.2281(10)      | C <sub>0AA</sub> | C <sub>1</sub>   | 1.513(8)        |
| l <sub>4</sub> | Sb <sub>1</sub> | 3.3810(10)      | C <sub>0AA</sub> | C <sub>2</sub>   | 1.500(9)        |
| l <sub>4</sub> | Sb <sub>1</sub> | 3.3560(9)       | C <sub>0AA</sub> | C <sub>4</sub>   | 1.521(8)        |
| l <sub>4</sub> | Sb <sub>2</sub> | 3.3378(13)      | N <sub>2</sub>   | C <sub>5</sub>   | 1.514(7)        |
| l <sub>5</sub> | Sb <sub>1</sub> | 2.9530(12)      | C <sub>5</sub>   | C <sub>6</sub>   | 1.541(10)       |
| l <sub>5</sub> | Sb <sub>2</sub> | 3.2066(9)       | C <sub>5</sub>   | C <sub>7</sub>   | 1.510(9)        |
| l <sub>6</sub> | Sb <sub>2</sub> | 2.8109(11)      | C <sub>5</sub>   | C <sub>8</sub>   | 1.502(10)       |

**Table S3.** Bond angles for **1**

| Atom             | Atom | Atom | Angle/°     | Atom | Atom | Atom | Angle/°     |
|------------------|------|------|-------------|------|------|------|-------------|
| Sb1              | I3   | Sb2  | 96.79(3)    | I6   | Sb2  | I7   | 94.57(3)    |
| Sb1 <sup>1</sup> | I4   | Sb1  | 88.86(3)    | I6   | Sb2  | I8   | 94.89(3)    |
| Sb2              | I4   | Sb1  | 87.07(2)    | I7   | Sb2  | I3   | 176.012(14) |
| Sb2              | I4   | Sb1  | 90.13(3)    | I7   | Sb2  | I4   | 89.97(3)    |
| Sb1 <sup>1</sup> | I5   | Sb2  | 96.85(3)    | I7   | Sb2  | I5   | 93.45(3)    |
| I1               | Sb1  | I2   | 90.21(3)    | I7   | Sb2  | I8   | 89.97(3)    |
| I1               | Sb1  | I3   | 92.02(3)    | I8   | Sb2  | I3   | 89.32(3)    |
| I1               | Sb1  | I4   | 89.96(3)    | I8   | Sb2  | I4   | 92.55(3)    |
| I1               | Sb1  | I5   | 91.94(3)    | I8   | Sb2  | I5   | 176.324(14) |
| I2               | Sb1  | I3   | 90.01(3)    | C1   | COAA | N3   | 106.5(5)    |
| I2               | Sb1  | I4   | 176.934(14) | C1   | COAA | C4   | 111.5(5)    |
| I2               | Sb1  | I5   | 93.35(3)    | C2   | COAA | N3   | 106.7(5)    |
| I3               | Sb1  | I4   | 86.92(3)    | C2   | COAA | C1   | 114.1(6)    |
| I5 <sup>1</sup>  | Sb1  | I3   | 174.793(14) | C2   | COAA | C4   | 110.9(6)    |
| I5 <sup>1</sup>  | Sb1  | I4   | 89.70(3)    | C4   | COAA | N3   | 106.7(4)    |
| I3               | Sb2  | I4   | 86.14(3)    | N2   | C5   | C6   | 105.4(6)    |
| I5               | Sb2  | I3   | 87.18(3)    | C7   | C5   | N2   | 107.3(5)    |
| I5               | Sb2  | I4   | 86.11(2)    | C7   | C5   | C6   | 110.7(6)    |
| I6               | Sb2  | I3   | 89.40(3)    | C8   | C5   | N2   | 106.7(5)    |
| I6               | Sb2  | I4   | 171.272(16) | C8   | C5   | C6   | 112.3(6)    |
| I6               | Sb2  | I5   | 86.18(3)    | C8   | C5   | C7   | 113.7(7)    |
